# Supplementary material for: Predictions of Preterm Birth from Early Pregnancy Characteristics: Born in Guangzhou Cohort Study
Source: MDPI journal article supplement (doi:10.3390/jcm7080185), 2018-07-27
Supplement: s1 [file s1]

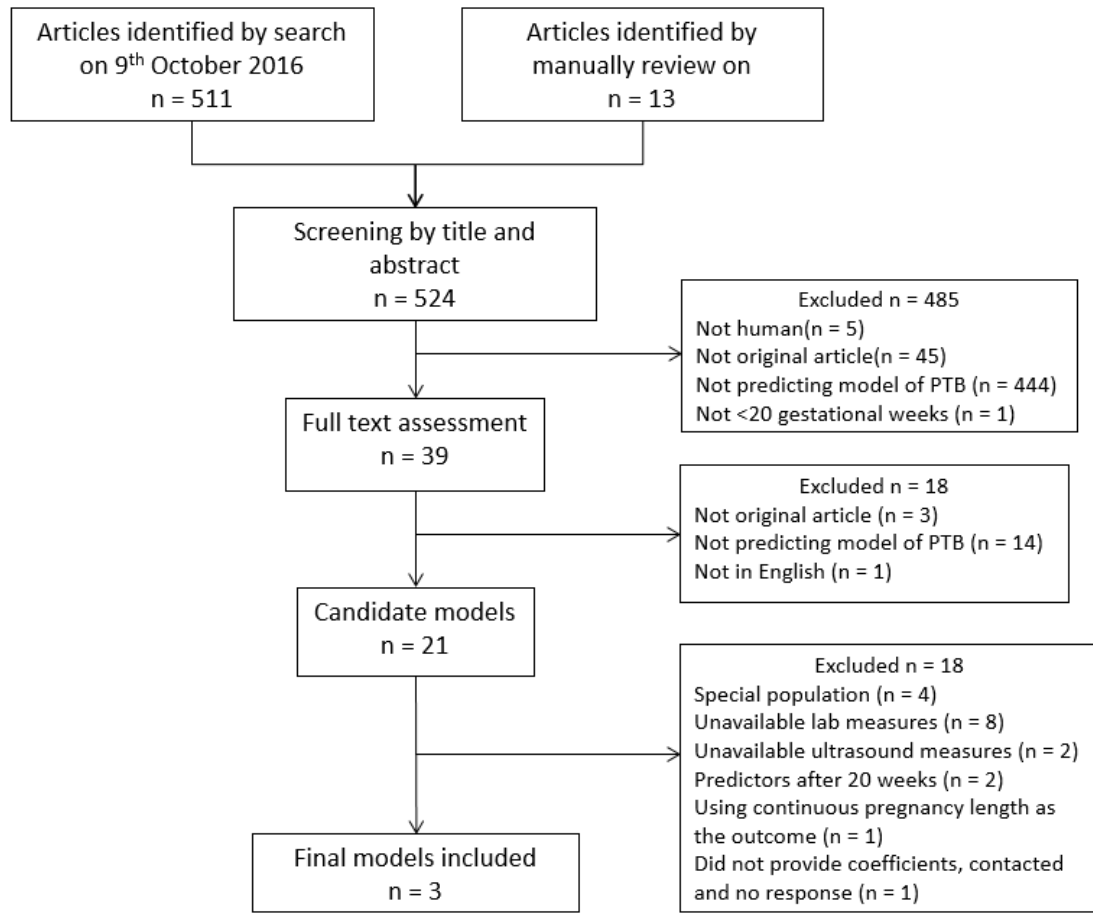

**Figure S1.** Flowchart of study inclusion in systematic review.

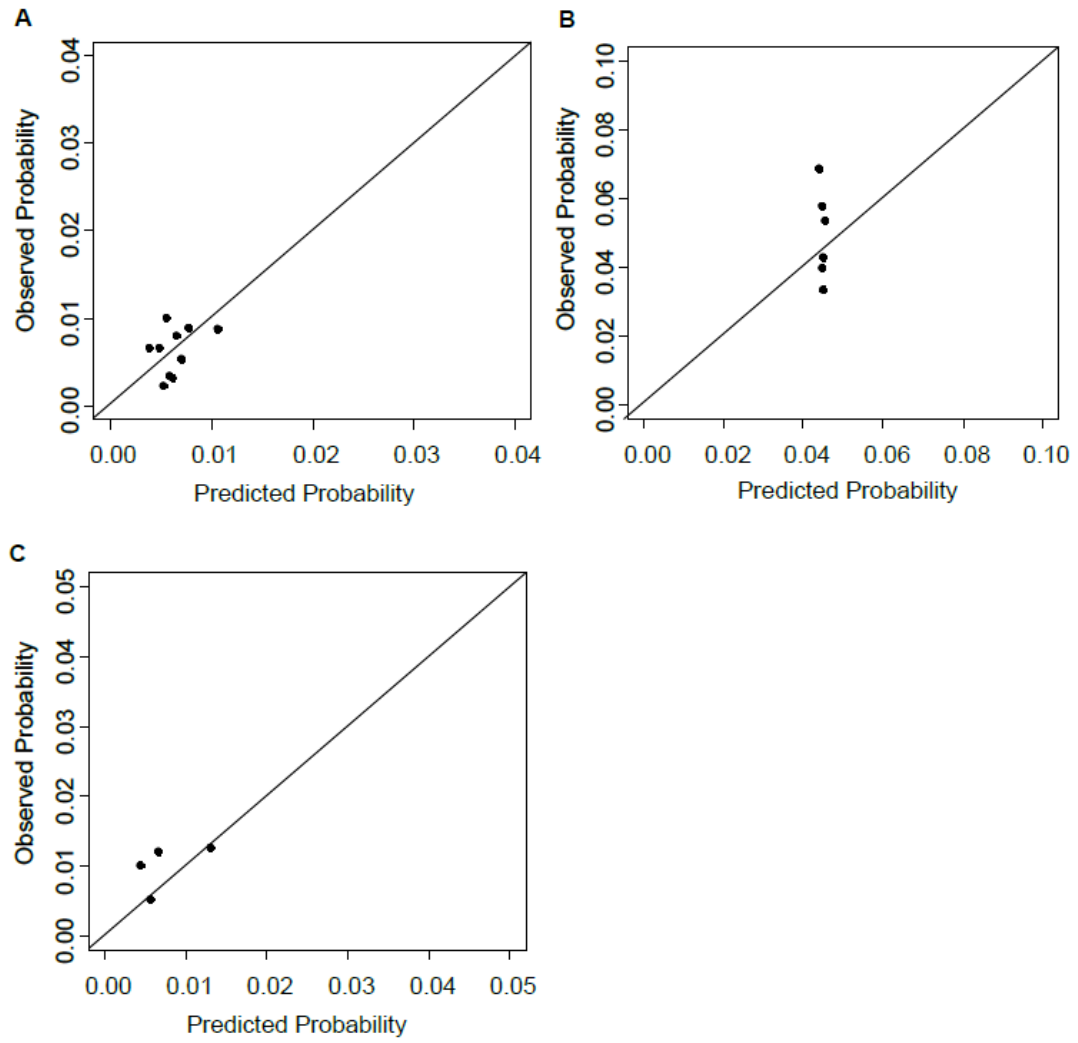

**Figure S2.** Calibration plots for the predicted probability and observed proportions of models by (A) Beta J *et al.*, (B) Sananes N *et al.*, and (C) Parra-Cordero M *et al.* The black dots indicate deciles of women with similar predicted risk of preterm birth.

**Table S1.** Search Strategy for MEDLINE (adopted and modified from Am J Obstet Gynecol. 2016 Jan; 214(1):79-90 [1]).

| Steps | Search term                                                                                                                                                                                                                          |
|-------|--------------------------------------------------------------------------------------------------------------------------------------------------------------------------------------------------------------------------------------|
| #1    | Search (Validat*[tiab] OR Predict*[ti] OR Rule*[tiab])                                                                                                                                                                               |
| #2    | Search (Predict*[tiab] AND (Outcome*[tiab] OR Risk*[tiab] OR Model*[tiab]))                                                                                                                                                          |
| #3    | Search ((History[tiab] OR Variable*[tiab] OR Criteria[tiab] OR Scor*[tiab] OR Characteristic*[tiab] OR Finding*[tiab] OR Factor*[tiab]) AND (Predict*[tiab] OR Model*[tiab] OR Decision*[tiab] OR Identif*[tiab] OR Prognos*[tiab])) |
| #4    | Search (Decision*[tiab] AND (Model*[tiab] OR Clinical*[tiab] OR Logistic Model*[tiab]))                                                                                                                                              |
| #5    | Search (Prognostic[tiab] AND (History[tiab] OR Variable*[tiab] OR Criteria[tiab] OR Scor*[tiab] OR Characteristic*[tiab] OR Finding*[tiab] OR Factor*[tiab] OR Model*[tiab]))                                                        |
| #6    | Search (“risk score”[All fields] OR “prediction model”[All fields] OR “prediction rule”[All fields] OR “risk assessment”[All fields] OR “algorithm”[All fields])                                                                     |
| #7    | #1 OR #2 OR #3 OR #4 OR #5 OR #6                                                                                                                                                                                                     |
| #8    | Search (premature deliver*[tiab] OR premature labour[tiab] OR premature labor[tiab] OR premature birth[tiab] OR preterm deliver*[tiab] OR preterm labour[tiab] OR preterm labor[tiab] OR preterm birth[tiab])                        |
| #9    | Search (first trimester[tiab] OR early pregnancy[tiab])                                                                                                                                                                              |
| #10   | #7 AND #8 AND #9                                                                                                                                                                                                                     |

**Table S2.** Full equations for published model for preterm birth prediction.

|                                                                                                                                                                                                                                                                                                                                                                                                                                                                                                                                                                                                                                                                                                                                                                                                                                                                                                                                                                                                                             |
|-----------------------------------------------------------------------------------------------------------------------------------------------------------------------------------------------------------------------------------------------------------------------------------------------------------------------------------------------------------------------------------------------------------------------------------------------------------------------------------------------------------------------------------------------------------------------------------------------------------------------------------------------------------------------------------------------------------------------------------------------------------------------------------------------------------------------------------------------------------------------------------------------------------------------------------------------------------------------------------------------------------------------------|
| Parra-Cordero M <i>et al.</i> (2014) <sup>22</sup>                                                                                                                                                                                                                                                                                                                                                                                                                                                                                                                                                                                                                                                                                                                                                                                                                                                                                                                                                                          |
| The probability of preterm birth was calculated as: $e^X/(1+e^X)$ , where<br>For Parous women, $X = \alpha + 1.52606$ (if previous preterm delivery).<br>For nulliparous = $\alpha + 1.16315$ (if smoking during pregnancy).                                                                                                                                                                                                                                                                                                                                                                                                                                                                                                                                                                                                                                                                                                                                                                                                |
| Sananes N <i>et al.</i> (2013) <sup>20</sup>                                                                                                                                                                                                                                                                                                                                                                                                                                                                                                                                                                                                                                                                                                                                                                                                                                                                                                                                                                                |
| The probability of preterm birth was calculated as: $e^X/(1+e^X)$ , where<br>$X = \alpha + 0.24920 \times$ (if maternal age $\leq 22$ or $\geq 35$ ) $+ 0.32930 \times$ (if BMI $\leq 19$ ) $+ 0.28818 \times$ (if smoke) $+ 0.77242 \times$ (if previous miscarriage at 16–23 weeks) $+ 1.62492 \times$ (if previous preterm delivery at 24–27 weeks) $+ 0.66217 \times$ (if previous preterm delivery at 28–33 weeks) $+ 1.13269 \times$ (if previous preterm delivery at 34–36 weeks) $- 0.61990 \times$ (if previous term delivery at $\geq 37$ weeks).                                                                                                                                                                                                                                                                                                                                                                                                                                                                 |
| Beta J <i>et al.</i> (2011) <sup>21</sup>                                                                                                                                                                                                                                                                                                                                                                                                                                                                                                                                                                                                                                                                                                                                                                                                                                                                                                                                                                                   |
| The probability of preterm birth was calculated as: $e^X/(1+e^X)$ , where<br>$X = \alpha + 0.02469 \times$ (maternal age, years) $- 0.01918 \times$ (height, cm) $+ 0.58945$ (if African) $+ 0.55389$ (if South Asian) $+ 0.16805$ (if Eastern Asian) <sup>#</sup> $- 0.40048$ (if Mixed) $+ 0.56702 \times$ (if smoke) $+ 0.53532$ (if assisted conception) <sup>\$</sup> $+ 0.23902 \times$ (if nulliparous and previous fetal loss at $< 16$ weeks) $+ 1.97602 \times$ (if nulliparous and previous miscarriage at 16–23 weeks) $+ 1.73431 \times$ (if nulliparous and previous miscarriage at 24–27 weeks) <sup>&amp;</sup> $+ 1.50319 \times$ (if previous preterm delivery at 28–30 weeks) <sup>&amp;</sup> $+ 1.14199 \times$ (if previous preterm delivery at 31–33 weeks) <sup>&amp;</sup> $+ 0.90745 \times$ (if previous preterm delivery at 34–36 weeks) <sup>&amp;</sup> $- 0.41400 \times$ (if previous term delivery at $> 37$ weeks) $+ 0.30895$ (if parous iatrogenic preterm delivery) <sup>&amp;</sup> . |

<sup>#</sup> All women are eastern Asian in the current study.

<sup>\$</sup> All women had no assisted conception in the current study.

<sup>&</sup> These terms were generated using gestational age of previous delivery because we couldn't differentiate if previous preterm delivery was spontaneous or not; therefore, we did not include the term, "if parous iatrogenic preterm delivery", which was not significant in the original model (P = 0.60).

**Table S3.** Comparisons of socio-demographic characteristics between women with preterm and term births (before imputation).

| Maternal characteristics                                 | Term<br>births, N<br>(%) | Overall PTB     |        | Spontaneous PTB |        | Iatrogenic PTB  |      |
|----------------------------------------------------------|--------------------------|-----------------|--------|-----------------|--------|-----------------|------|
|                                                          |                          | N (%)           | P      | N (%)           | P      | N (%)           | P    |
| Total                                                    | 8600                     | 444             |        | 340             |        | 68              |      |
| Age (years), mean $\pm$ SD                               | 28.7 $\pm$ 3.3           | 29.5 $\pm$ 3.4  | <0.001 | 29.4 $\pm$ 3.5  | <0.001 | 29.9 $\pm$ 3.2  | 0.01 |
| Educational level                                        |                          |                 |        |                 |        |                 |      |
| Middle school or below                                   | 908                      | 56 (5.8)        | 0.22   | 40 (4.2)        | 0.36   | 9 (1.0)         | 0.82 |
| College                                                  | 2205                     | 126 (5.4)       |        | 99 (4.3)        |        | 18 (0.8)        |      |
| Undergraduate                                            | 4496                     | 214(4.5)        |        | 163 (3.5)       |        | 35 (0.8)        |      |
| Postgraduate                                             | 991                      | 48 (4.6)        |        | 38 (3.7)        |        | 6 (0.6)         |      |
| Monthly income (Yuan)                                    |                          |                 |        |                 |        |                 |      |
| $\leq$ 1500                                              | 806                      | 46 (5.4)        | 0.63   | 31 (3.7)        | 0.92   | 8 (1.0)         | 0.35 |
| 1501–4500                                                | 2620                     | 124 (4.5)       |        | 99 (3.6)        |        | 14 (0.5)        |      |
| 4501–9000                                                | 3403                     | 171 (4.8)       |        | 130 (3.7)       |        | 30 (0.9)        |      |
| $\geq$ 9001                                              | 1281                     | 71 (5.3)        |        | 54 (4.0)        |        | 12 (0.9)        |      |
| Missing                                                  | 490                      | 32              |        | 26              |        | 4               |      |
| Height (cm), mean $\pm$ SD                               | 160.0 $\pm$ 4.8          | 159.5 $\pm$ 4.4 | 0.01   | 159.5 $\pm$ 4.5 | 0.07   | 159.3 $\pm$ 4.2 | 0.15 |
| Missing                                                  | 324                      | 24              |        | 20              |        | 2               |      |
| Pre-pregnancy BMI<br>(kg/m <sup>2</sup> ), mean $\pm$ SD | 20.3 $\pm$ 2.7           | 20.5 $\pm$ 2.8  | 0.08   | 20.5 $\pm$ 2.8  | 0.06   | 20.4 $\pm$ 3.1  | 0.46 |
| Missing                                                  | 439                      | 32              |        | 28              |        | 2               |      |

PTB: preterm birth; BMI: body mass index. P values based on t test for continuous variables and chi-square test for categorical variables.

The total for spontaneous and iatrogenic births does not add to total preterm births due to missing values for these variables.

**Table S4.** Comparisons of obstetric and disease history between women with preterm and term births (before imputation).

| Maternal characteristics               | Term<br>births, N | PTB       |        | Spontaneous PTB |        | Iatrogenic PTB |      |
|----------------------------------------|-------------------|-----------|--------|-----------------|--------|----------------|------|
|                                        |                   | N (%)     | P      | N (%)           | P      | N (%)          | P    |
| Obstetric history                      |                   |           |        |                 |        |                |      |
| Gravidity                              |                   |           |        |                 |        |                |      |
| 1                                      | 5216              | 258 (4.7) | 0.51   | 203 (3.8)       | 0.88   | 39 (0.7)       | 0.51 |
| >1                                     | 3060              | 162 (5.0) |        | 117 (3.7)       |        | 27 (0.9)       |      |
| Missing                                | 324               | 24        |        | 20              |        | 2              |      |
| Parity                                 |                   |           |        |                 |        |                |      |
| Nulliparous                            | 7608              | 376 (4.7) | 0.02   | 290 (3.6)       | 0.12   | 58 (0.7)       | 0.37 |
| Multiparous                            | 962               | 65 (6.3)  |        | 47 (4.6)        |        | 10 (1.0)       |      |
| Missing                                | 30                | 3         |        | 3               |        | 0              |      |
| History of previous preterm birth      |                   |           |        |                 |        |                |      |
| No                                     | 8414              | 419 (4.7) | <0.001 | 321 (3.6)       | <0.001 | 65 (0.7)       | 0.01 |
| Yes                                    | 50                | 12 (19.4) |        | 10 (16.1)       |        | 2 (3.2)        |      |
| Missing                                | 136               | 13        |        | 9               |        | 1              |      |
| Planned pregnancy                      |                   |           |        |                 |        |                |      |
| Yes                                    | 6222              | 310 (4.8) | 0.59   | 239 (3.7)       | 0.85   | 48 (0.8)       | 0.75 |
| No                                     | 2134              | 113 (5.0) |        | 84 (3.8)        |        | 18 (0.8)       |      |
| Missing                                | 244               | 21        |        | 17              |        | 2              |      |
| History of disease                     |                   |           |        |                 |        |                |      |
| Diabetes/hypertension before pregnancy |                   |           |        |                 |        |                |      |

|                                  |      |           |      |           |      |          |      |
|----------------------------------|------|-----------|------|-----------|------|----------|------|
| No                               | 8267 | 419 (4.8) | 0.84 | 319 (3.7) | 0.64 | 66 (0.8) | 0.72 |
| Yes                              | 16   | 1 (5.9)   |      | 1 (5.9)   |      | 0 (0)    |      |
| Missing                          | 317  | 24        |      | 20        |      | 2        |      |
| Thyroid disease before pregnancy |      |           |      |           |      |          |      |
| Never                            | 8129 | 413 (4.8) | 0.28 | 314 (3.7) | 0.51 | 65 (0.8) | 0.35 |
| Only hypothyroidism              | 43   | 4 (8.5)   |      | 3 (6.5)   |      | 1 (2.3)  |      |
| Only hyperthyroidism or both     | 110  | 3 (2.7)   |      | 3 (2.7)   |      | 0 (0)    |      |
| Missing                          | 318  | 24        |      | 20        |      | 2        |      |
| Family history of diabetes       |      |           |      |           |      |          |      |
| No                               | 7510 | 375 (4.8) | 0.37 | 284 (3.6) | 0.23 | 60 (0.8) | 0.80 |
| Yes                              | 835  | 48 (5.4)  |      | 39 (4.5)  |      | 6 (0.7)  |      |
| Missing                          | 255  | 21        |      | 17        |      | 2        |      |
| Family history of hypertension   |      |           |      |           |      |          |      |
| No                               | 6161 | 303 (4.7) | 0.30 | 231 (3.6) | 0.32 | 48 (0.8) | 0.85 |
| Yes                              | 2192 | 121 (5.2) |      | 93 (4.1)  |      | 18 (0.8) |      |
| Missing                          | 247  | 20        |      | 16        |      | 2        |      |
| Family history of heart disease  |      |           |      |           |      |          |      |
| No                               | 7948 | 400 (4.8) | 0.35 | 305 (3.7) | 0.32 | 62 (0.8) | 0.59 |
| Yes                              | 389  | 24 (5.8)  |      | 19 (4.7)  |      | 4 (1.0)  |      |
| Missing                          | 263  | 20        |      | 16        |      | 2        |      |

PTB: preterm birth. P values were derived from chi-square tests

The total for spontaneous and iatrogenic births does not add to total preterm births due to missing values for these variables.

**Table S5.** Comparisons of pregnancy conditions between women with preterm and term births (before imputation).

| Maternal characteristics    | Term<br>births<br>N (%) | PTB        |        | Spontaneous PTB |        | Iatrogenic PTB |      |
|-----------------------------|-------------------------|------------|--------|-----------------|--------|----------------|------|
|                             |                         | N (%)      | P      | N (%)           | P      | N (%)          | P    |
| Timing of vaginal bleeding  |                         |            |        |                 |        |                |      |
| Never                       | 5937                    | 251 (4.1)  | <0.001 | 190 (3.1)       | <0.001 | 40 (0.7)       | 0.03 |
| <13 weeks                   | 2087                    | 133 (6.0)  |        | 107 (4.9)       |        | 18 (0.9)       |      |
| ≥13 weeks                   | 227                     | 26 (10.3)  |        | 19 (7.7)        |        | 5 (2.2)        |      |
| Missing                     | 349                     | 24         |        | 24              |        | 5              |      |
| Amount of vagina bleeding   |                         |            |        |                 |        |                |      |
| Never                       | 5937                    | 251 (4.1)  | <0.001 | 190 (3.1)       | <0.001 | 40 (0.7)       | 0.02 |
| Mild                        | 1948                    | 139 (6.7)  |        | 108 (5.3)       |        | 24 (1.2)       |      |
| Moderate or severe          | 450                     | 30 (6.3)   |        | 24 (5.1)        |        | 1 (0.2)        |      |
| Missing                     | 265                     | 24         |        | 18              |        | 3              |      |
| Anxiety during pregnancy    | 41.7 ± 7.4              | 41.9 ± 7.6 | 0.61   | 41.7 ± 7.6      | 0.66   | 43.1 ± 7.8     | 0.22 |
| Missing                     | 402                     | 28         |        | 24              |        | 3              |      |
| Depression during pregnancy | 44.5 ± 8.8              | 44.5 ± 9.1 | 0.93   | 44.5 ± 9.2      | 0.72   | 45.2 ± 9.5     | 0.98 |
| Missing                     | 402                     | 28         |        | 24              |        | 2              |      |

PTB: preterm birth. P values were derived from chi-square tests.

The total for spontaneous and iatrogenic births does not add to total preterm births due to missing values for these variables.



**Table S6.** Comparisons of modifiable factors between women with preterm and term births (before imputation).

| Maternal characteristics              | Term      | PTB       |      | Spontaneous PTB |      | Iatrogenic PTB |      |
|---------------------------------------|-----------|-----------|------|-----------------|------|----------------|------|
|                                       | births, N | N (%)     | P    | N (%)           | P    | N (%)          | P    |
| Working posture                       |           |           |      |                 |      |                |      |
| Not work                              | 1148      | 63 (5.2)  | 0.26 | 44 (3.7)        | 0.83 | 11 (1.0)       | 0.21 |
| Sitting                               | 5075      | 245 (4.6) |      | 196 (3.7)       |      | 33 (0.7)       |      |
| Standing                              | 1890      | 108 (5.4) |      | 77 (3.9)        |      | 21 (1.1)       |      |
| Walking and others                    | 247       | 8 (3.1)   |      | 7 (2.8)         |      | 1 (0.4)        |      |
| Missing                               | 240       | 20        |      | 16              |      | 2              |      |
| Smoking during peri-conception period |           |           |      |                 |      |                |      |
| Never                                 | 8156      | 412 (4.8) | 0.71 | 314 (3.7)       | 0.86 | 64 (0.8)       | 0.29 |
| Ever                                  | 120       | 7 (5.5)   |      | 5 (4.0)         |      | 2 (1.6)        |      |
| Missing                               | 324       | 25        |      | 21              |      | 2              |      |
| Passive smoking before pregnancy      |           |           |      |                 |      |                |      |
| Never                                 | 5195      | 254 (4.7) | 0.37 | 203 (3.8)       | 0.76 | 35 (0.7)       | 0.10 |
| Ever                                  | 3077      | 165 (5.1) |      | 116 (3.6)       |      | 31 (1.0)       |      |
| Missing                               | 328       | 25        |      | 21              |      | 2              |      |
| Passive smoking during pregnancy      |           |           |      |                 |      |                |      |
| Never                                 | 5748      | 288 (4.8) | 0.80 | 228 (3.8)       | 0.40 | 39 (0.7)       | 0.07 |
| Ever                                  | 2523      | 130 (4.9) |      | 90 (3.4)        |      | 27 (1.1)       |      |
| Missing                               | 329       | 26        |      | 22              |      | 2              |      |

|                                    |      |           |      |           |      |          |      |
|------------------------------------|------|-----------|------|-----------|------|----------|------|
| Folic acid intake before pregnancy |      |           |      |           |      |          |      |
| Never                              | 4627 | 259 (5.3) | 0.02 | 193 (4.0) | 0.11 | 42 (0.9) | 0.21 |
| Ever                               | 3645 | 160 (4.2) |      | 126 (3.3) |      | 24 (0.7) |      |
| Missing                            | 328  | 25        |      | 21        |      | 2        |      |
| Folic acid intake during pregnancy |      |           |      |           |      |          |      |
| Never                              | 723  | 35 (4.6)  | 0.79 | 28 (3.7)  | 0.98 | 2 (0.3)  | 0.10 |
| Ever                               | 7555 | 384 (4.8) |      | 291 (3.7) |      | 64 (0.8) |      |
| Missing                            | 322  | 25        |      | 21        |      | 2        |      |

PTB: preterm birth. P values were derived from chi-square tests.

The total for spontaneous and iatrogenic births does not add to total preterm births due to missing values for these variables.

**Table S7.** Prediction models stratified by parity status.

| Predictors                                           | Nulliparous women |        | Multiparous women |        |
|------------------------------------------------------|-------------------|--------|-------------------|--------|
|                                                      | HR (95% CI)       | P      | HR (95% CI)       | P      |
| <b><u>Models for all PTB</u></b>                     |                   |        |                   |        |
| Age (per year increase)                              | 1.07 (1.03–1.10)  | <0.001 | -                 |        |
| Height (per cm increase)                             | 0.98 (0.96–1.00)  | 0.03   | -                 |        |
| Amount of vaginal-bleeding                           |                   |        |                   |        |
| Never                                                | 1.00 (reference)  |        | -                 |        |
| Mild                                                 | 1.77 (1.41–2.21)  | <0.001 | -                 |        |
| Moderate or severe                                   | 1.63 (1.09–2.44)  | 0.02   | -                 |        |
| Folic acid intake before pregnancy                   |                   |        |                   |        |
| Never                                                | 1.00 (reference)  |        | -                 |        |
| Ever                                                 | 0.79 (0.64–0.97)  | 0.03   | -                 |        |
| History of previous preterm birth                    |                   |        |                   |        |
| No                                                   | -                 |        | 1.00 (reference)  | <0.001 |
| Yes                                                  | -                 |        | 4.84 (2.57–9.15)  |        |
| Family history of hypertension                       |                   |        |                   |        |
| No                                                   | -                 |        | 1.00 (reference)  | 0.02   |
| Yes                                                  | -                 |        | 1.81 (1.08–3.03)  |        |
| <b><u>Models for spontaneous PTB</u></b>             |                   |        |                   |        |
| Age (per year increase)                              | 1.06 (1.02–1.09)  | 0.001  |                   |        |
| Amount of vaginal-bleeding                           |                   |        |                   |        |
| Never                                                | 1.00 (reference)  |        |                   |        |
| Mild                                                 | 1.79 (1.40–2.29)  | <0.001 |                   |        |
| Moderate or severe                                   | 1.90 (1.26–2.89)  | 0.002  |                   |        |
| Folic acid intake before pregnancy                   |                   |        |                   |        |
| Never                                                | 1.00 (reference)  | 0.04   |                   |        |
| Ever                                                 | 0.78 (0.62–0.99)  |        |                   |        |
| History of previous preterm birth                    |                   |        |                   |        |
| No                                                   | -                 |        | 1.00 (reference)  | <0.001 |
| Yes                                                  | -                 |        | 4.93 (2.58–9.42)  |        |
| Family history of hypertension                       |                   |        |                   |        |
| No                                                   | -                 |        | 1.00 (reference)  | 0.02   |
| Yes                                                  | -                 |        | 1.98 (1.12–3.51)  |        |
| <b><u>Models for iatrogenic PTB <sup>a</sup></u></b> |                   |        |                   |        |
| Age (per year increase)                              | 1.11 (1.04–1.19)  | 0.004  | -                 |        |

PTB: preterm birth. HR: hazard ratios. CI: confidence interval.

<sup>a</sup> There was no significant predictor for multiparous women.

## References

1. Kleinrouweler, C.E.; Cheong-See, F.M.; Collins, G.S.; Kwee, A.; Thangaratinam, S.; Khan, K.S.; Mol, B.W.J.; Pajkrt, E.; Moons, K.G.M.; Schuit, E. Prognostic models in obstetrics: Available, but far from applicable. *Am. J. Obstet. Gynecol.* **2016**, *214*, 79–90 e36, doi:10.1016/j.ajog.2015.06.013.
